# Supplementary material for: Aging-related elevation of sphingoid bases shortens yeast chronological life span by compromising mitochondrial function
Source: PubMed Central journal article supplement (PMC5008273; doi:10.18632/oncotarget.8195), 2016-03-19
Supplement: oncotarget-07-21124-s001.pdf [file oncotarget-07-21124-s001.pdf]

# Aging-related elevation of sphingoid bases shortens yeast chronological life span by compromising mitochondrial function

## Supplementary Material

**A**

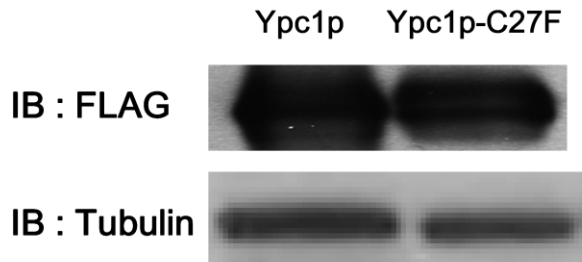

**B**

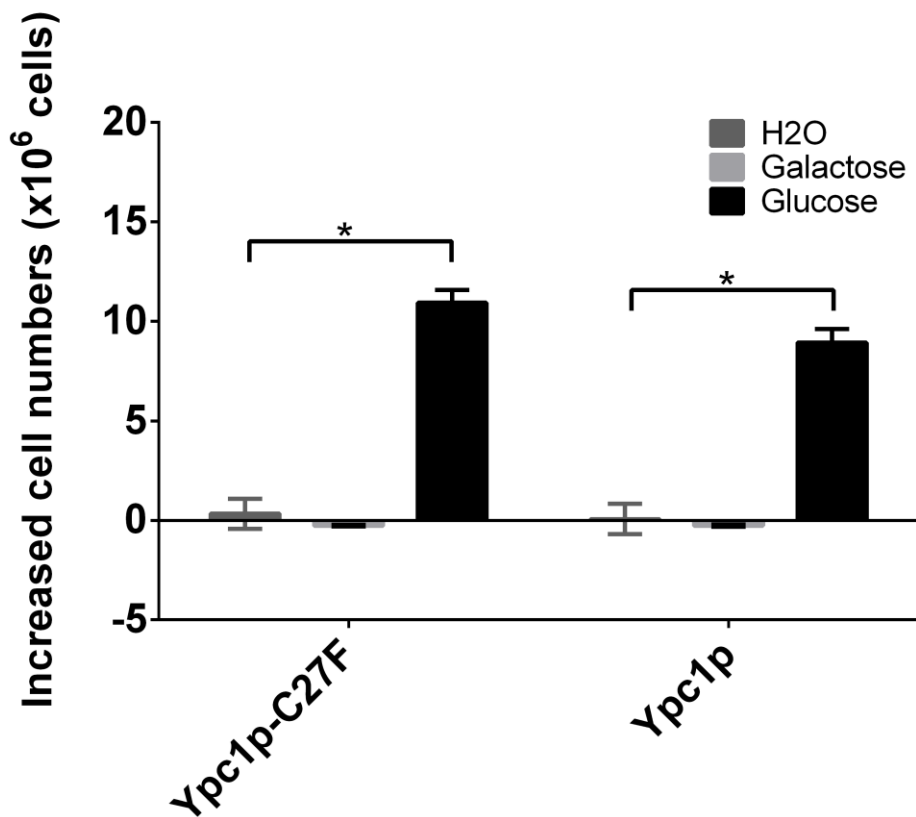

**Figure S1. Gal1Δ overexpressing either Ypc1p or Ypc1p-C27F.** **A**, Western blot analyses of Ypc1p and Ypc1p-C27F. Gal1Δ cells expressing the FLAG-tagged Ypc1p or its mutant, Ypc1p-C27F, were analyzed by Western blot analyses using anti-FLAG antibody as described in Materials and Methods. **B**, Cell numbers were counted 24 hr after addition of either H<sub>2</sub>O, glucose or galactose to verify if galactose can induce the cell growth in Gal1 Δ. Data represent mean of ± SD; n=3. \*p<0.05.

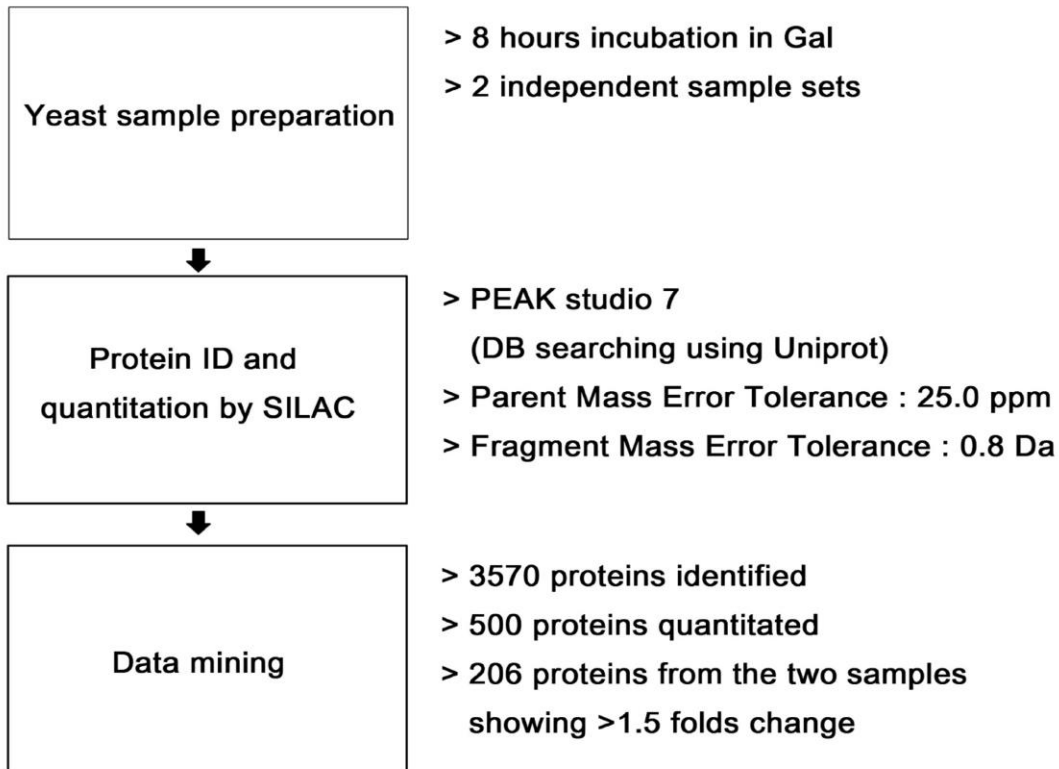

**Figure S2** Workflow of SILAC.

**Table S1.** Strains used in this study

| Strain                                                | Genotype                                                             | Relevant gene or description             | Source                                      |
|-------------------------------------------------------|----------------------------------------------------------------------|------------------------------------------|---------------------------------------------|
| <b>JK93d</b>                                          | MAT $\alpha$ leu2–3,112 ura3–52 rme1 trp1 his4                       | Parental strain                          | This study                                  |
| <b>Ydc1<math>\Delta</math></b>                        | Isogenic to JK93d, $\Delta$ 087::UraBbrP1                            | $\Delta$ 087=DHcer                       | [7]                                         |
| <b>Ypc1<math>\Delta</math></b>                        | Isogenic to JK93d, $\Delta$ 183::G418                                | $\Delta$ 183=PHcer                       | [7]                                         |
| <b>Ydc1<math>\Delta</math>Ypc1<math>\Delta</math></b> | Isogenic to JK93d, $\Delta$ 183::G418<br>$\Delta$ 087::UraBbrP1      | $\Delta$ 183=PHcer<br>$\Delta$ 087=DHcer | [7]                                         |
| <b>Lcb4<math>\Delta</math>Lcb5<math>\Delta</math></b> | Isogenic to JK93d, lcb4-1 lcb5-1                                     |                                          | [39]                                        |
| <b>YAG6B</b>                                          | MAT $\alpha$ his3 leu2 met15 ura3<br>YHR018c::kanMX4 YIR034c::kanMX4 | SILAC strain                             | A kind gift from Dr. Nils Faergeman<br>[31] |
| <b>Yi9</b>                                            | Isogenic to YAG6B, pYES2::FLAG                                       | Empty vector                             | This study                                  |
| <b>Yi10</b>                                           | Isogenic to YAG6B pYES2::YPC1                                        | Ypc1p overexpression                     | This study                                  |
| <b>Yi11</b>                                           | Isogenic to YAG6B pYES2::YPC1 <sup>C27F</sup>                        | Ypc1p-C27F overexpression                | This study                                  |
| <b>W303-1A</b>                                        | MAT $\alpha$ leu2-3,112 trp1-1 can1-100 ura3-1<br>ade2-1 his3-11,15  |                                          | A kind gift from Dr. Ales Vancura<br>[69]   |
| <b>Msn2<math>\Delta</math>Msn4<math>\Delta</math></b> | Isogenic to W303-1A, msn2::HIS3<br>msn4::URA3                        |                                          | A kind gift from Dr. Ales Vancura<br>[69]   |
| <b>BY4742</b>                                         | MAT $\alpha$ his3-1 leu2-0 lys2-0 ura3-0                             |                                          | [70]                                        |
| <b>Msn2<math>\Delta</math></b>                        | Isogenic to BY4742, msn2::kanMX4                                     |                                          | [70]                                        |
| <b>Msn4<math>\Delta</math></b>                        | Isogenic to BY4742, msn4::kanMX4                                     |                                          | [70]                                        |

**Table S2.** Primers used in this study

| <b>Targets</b> | <b>Primers</b> | <b>Sequences (5'&gt;3')</b>                                                                                                                          |
|----------------|----------------|------------------------------------------------------------------------------------------------------------------------------------------------------|
| <b>ACT1</b>    | Forward        | GTATGTGTAAAGCCGGTTTTG                                                                                                                                |
|                | Reverse        | CATGATACCTTGGTGTCTTGG                                                                                                                                |
| <b>COX1</b>    | Forward        | CTACAGATACAGCATTTCOAAGA                                                                                                                              |
|                | Reverse        | GTGCCTGAATAGATGATAATGGT                                                                                                                              |
| <b>YDC1</b>    | Forward        | GAATGGGGTTCTCGCTGGTT                                                                                                                                 |
|                | Reverse        | TGGTCGCATACAGCATTGGT                                                                                                                                 |
| <b>YPC1</b>    | Forward        | ATTGGCTTCGGGTACGGTTT                                                                                                                                 |
|                | Reverse        | CCTCTTTGGCCTCGCATACT                                                                                                                                 |
| <b>LAG1</b>    | Forward        | TTACTCCCTTTGTGTTTCGGCTT                                                                                                                              |
|                | Reverse        | TCACGACATGGCGCAGATAG                                                                                                                                 |
| <b>LAC1</b>    | Forward        | TGCTAAAAGGCGTATGCAGAGA                                                                                                                               |
|                | Reverse        | TCAAGGGAGCTATCCAGGCA                                                                                                                                 |
| <b>LCB4</b>    | Forward        | CTCAGCTACCTTGCGGTTCA                                                                                                                                 |
|                | Reverse        | TTTGACAAGGCACAGAGCGG                                                                                                                                 |
| <b>LCB5</b>    | Forward        | ATCGGAAACATCGACAACGGA                                                                                                                                |
|                | Reverse        | TCTGGCATCCAGAATTCGTCC                                                                                                                                |
| <b>YSR2</b>    | Forward        | GCCACGCACAAAGAAGGTG                                                                                                                                  |
|                | Reverse        | AGGGAAAATAGGACGGGGCT                                                                                                                                 |
| <b>YSR3</b>    | Forward        | ATCTGGGTGGTGCATGCTTT                                                                                                                                 |
|                | Reverse        | ACAAGCCCCATGCTACACTC                                                                                                                                 |
| <b>DPL1</b>    | Forward        | CTGCACATGCTGGGTTTGAC                                                                                                                                 |
|                | Reverse        | GAGCGGAACCGACCAGTAAA                                                                                                                                 |
| <b>N-GFP</b>   | Forward        | CCCGGGTACCAGATCTATGAGTAAAGGAGAAGAAC                                                                                                                  |
|                | Reverse        | CCGCTCGAGTTGGGCCAATTCCTTTTTTAAAGCCTGTAATTC<br>CCACTTTAATTGGGCTAATTCCTTTTTATTAGCTTGTAATTCC<br>TTTTTTAAAGCACCGGATCCAGATCCACCCTTTTGTGTTGTCTG<br>CCATGAT |
| <b>C-GFP</b>   | Forward        | GGGGTACCGAGCAGTTAGAAAAGAAGTTACAAGCTTTGGAA<br>AAGAAATTGGCACAATTAGAATGGAAGAATCAAGCCTTGGA<br>AAAGAAATTGGCACAAGGTGGATCTGGTAATGGAATCAAAG<br>TTAACTT       |

**Table S3. STREs in promoter regions of the genes of yeast sphingolipid-metabolizing enzymes.**

| <b>Genes</b> | <b>No. of STREs in the promoter region</b> | <b>Distance between two STREs (nt)</b> |
|--------------|--------------------------------------------|----------------------------------------|
| YDC1         | 1                                          | N/A                                    |
| YPC1         | 3                                          | 85, 185                                |
| LAG1         | 2                                          | 462 nt                                 |
| LAC1         | 1                                          | N/A                                    |
| DPL1         | 1                                          | N/A                                    |
| YSR2         | 1                                          | N/A                                    |
| YSR3         | 0                                          | N/A                                    |
| LCB4         | 2                                          | 196                                    |
| LCB5         | 0                                          | N/A                                    |

---

**Table S4.** Expression ratio of proteins in yeast cells in response to YPC1 overexpression (SILAC). (H, Ypc1p-overexpression. L, Ypc1p-C27F overexpression.)

| <b>Accession</b> | <b>Gene</b> | <b>Description</b>                              | <b>Average ratio (H:L)</b> |
|------------------|-------------|-------------------------------------------------|----------------------------|
| P15992           | HSP26       | Heat shock protein 26                           | 5.90                       |
| P09733           | TUB1        | Tubulin alpha-1 chain                           | 4.08                       |
| P38298           | YPC1        | Alkaline ceramidase YPC1                        | 3.94                       |
| P53228           | NQM1        | Transaldolase NQM1                              | 3.90                       |
| P32368           | SAC1        | Phosphoinositide phosphatase SAC1               | 3.20                       |
| P29952           | PMI40       | Mannose-6-phosphate isomerase                   | 3.15                       |
| Q00055           | GPD1        | Glycerol-3-phosphate dehydrogenase [NAD(+)] 1   | 3.14                       |
| P00330           | ADH1        | Alcohol dehydrogenase 1                         | 2.84                       |
| Q04432           | HSP31       | Probable chaperone protein HSP31                | 2.63                       |
| P32602           | SEC17       | Alpha-soluble NSF attachment protein            | 2.63                       |
| P14832           | CPR1        | Peptidyl-prolyl cis-trans isomerase             | 2.59                       |
| P37291           | SHM2        | Serine hydroxymethyltransferase cytosolic       | 2.55                       |
| P07264           | LEU1        | 3-isopropylmalate dehydratase                   | 2.47                       |
| P32356           | NTH1        | Neutral trehalase                               | 2.43                       |
| P06780           | RHO1        | GTP-binding protein RHO1                        | 2.36                       |
| Q04728           | ARG7        | Arginine biosynthesis bifunctional protein ArgJ | 2.33                       |
| Q12154           | GET3        | ATPase GET3                                     | 2.33                       |
| Q06151           | DCS1        | m7GpppX diphosphatase                           | 2.32                       |
| P38067           | UGA2        | Succinate-semialdehyde dehydrogenase [NADP(+)]  | 2.31                       |
| P38013           | AHP1        | Peroxiredoxin type-2                            | 2.29                       |
| Q12207           | NCE102      | Non-classical export protein 2                  | 2.26                       |
| Q12335           | PST2        | Protoplast secreted protein 2                   | 2.25                       |
| P13586           | PMR1        | Calcium-transporting ATPase 1                   | 2.25                       |

|        |       |                                            |      |
|--------|-------|--------------------------------------------|------|
| P54838 | DAK1  | Dihydroxyacetone kinase 1                  | 2.21 |
| P00950 | GPM1  | Phosphoglycerate mutase 1                  | 2.16 |
| P06169 | PDC1  | Pyruvate decarboxylase isozyme 1           | 2.16 |
| Q12019 | MDN1  | Midasin                                    | 2.14 |
| Q03558 | OYE2  | NADPH dehydrogenase 2                      | 2.06 |
| P14904 | LAP4  | Vacuolar aminopeptidase 1                  | 2.05 |
| P00358 | TDH2  | Glyceraldehyde-3-phosphate dehydrogenase 2 | 2.04 |
| Q01976 | YSA1  | ADP-ribose pyrophosphatase                 | 2.03 |
| P25293 | NAP1  | Nucleosome assembly protein                | 1.99 |
| Q12458 | YPR1  | Putative reductase 1                       | 1.97 |
| P38079 | YRO2  | Protein YRO2                               | 1.97 |
| P06208 | LEU4  | 2-isopropylmalate synthase                 | 1.95 |
| P04385 | GAL1  | Galactokinase                              | 1.94 |
| P07267 | PEP4  | Saccharopepsin                             | 1.93 |
| P06738 | GPH1  | Glycogen phosphorylase                     | 1.91 |
| P38715 | GRE3  | NADPH-dependent aldose reductase GRE3      | 1.90 |
| P54783 | ALO1  | D-arabinono-1 4-lactone oxidase            | 1.89 |
| P46367 | ALD4  | Potassium-activated aldehyde dehydrogenase | 1.87 |
| P47018 | MTC1  | Maintenance of telomere capping protein 1  | 1.87 |
| P12709 | PGI1  | Glucose-6-phosphate isomerase              | 1.86 |
| P37012 | PGM2  | Phosphoglucomutase-2                       | 1.85 |
| P47143 | ADO1  | Adenosine kinase                           | 1.85 |
| P80210 | ADE12 | Adenylosuccinate synthetase                | 1.84 |
| P41338 | ERG10 | Acetyl-CoA acetyltransferase               | 1.84 |
| P38972 | ADE6  | Phosphoribosylformylglycinamide synthase   | 1.83 |
| P17255 | VMA1  | V-type proton ATPase catalytic subunit A   | 1.81 |

|        |         |                                                    |      |
|--------|---------|----------------------------------------------------|------|
| P39958 | GDI1    | Rab GDP-dissociation inhibitor                     | 1.81 |
| Q06142 | KAP95   | Importin subunit beta-1                            | 1.81 |
| P00549 | CDC19   | Pyruvate kinase 1                                  | 1.81 |
| P38427 | TSL1    | Trehalose synthase complex regulatory subunit TSL1 | 1.81 |
| Q07551 | YDL124W | NADPH-dependent alpha-keto amide reductase G       | 1.81 |
| P22147 | XRN1    | 5'-3' exoribonuclease 1                            | 1.81 |
| P16862 | PFK2    | 6-phosphofructokinase subunit beta                 | 1.80 |
| P04802 | DPS1    | Aspartate--tRNA ligase cytoplasmic                 | 1.79 |
| P00942 | TPI1    | Triosephosphate isomerase                          | 1.77 |
| P08524 | ERG20   | Farnesyl pyrophosphate synthase                    | 1.77 |
| P31539 | HSP104  | Heat shock protein 104                             | 1.77 |
| P38911 | FPR3    | FK506-binding nuclear protein                      | 1.76 |
| P41921 | GLR1    | Glutathione reductase                              | 1.74 |
| P11154 | PYC1    | Pyruvate carboxylase 1                             | 1.74 |
| Q12074 | SPE3    | Spermidine synthase                                | 1.73 |
| P14540 | FBA1    | Fructose-bisphosphate aldolase                     | 1.73 |
| P49089 | ASN1    | Asparagine synthetase [glutamine-hydrolyzing] 1    | 1.73 |
| P25694 | CDC48   | Cell division control protein 48                   | 1.71 |
| P38625 | GUA1    | GMP synthase [glutamine-hydrolyzing]               | 1.71 |
| P32379 | PUP2    | Proteasome subunit alpha type-5                    | 1.71 |
| P34227 | PRX1    | Mitochondrial peroxiredoxin PRX1                   | 1.70 |
| P00729 | PRC1    | Carboxypeptidase Y                                 | 1.69 |
| P14742 | GFA1    | Glutamine--fructose-6-phosphate aminotransferase   | 1.68 |
| P15496 | IDI1    | Isopentenyl-diphosphate Delta-isomerase            | 1.68 |
| Q99383 | HRP1    | Nuclear polyadenylated RNA-binding protein 4       | 1.67 |
| P32589 | SSE1    | Heat shock protein homolog SSE1                    | 1.66 |



|        |         |                                                                    |      |
|--------|---------|--------------------------------------------------------------------|------|
| Q05016 | YMR226C | Uncharacterized oxidoreductase YMR226C G                           | 1.66 |
| P38993 | FET3    | Iron transport multicopper oxidase FET3                            | 1.65 |
| P23724 | PRE7    | Proteasome subunit beta type-6                                     | 1.64 |
| P36114 | YKR018C | Mitochondrial outer membrane protein YKR018C G                     | 1.64 |
| P15891 | ABP1    | Actin-binding protein                                              | 1.64 |
| P04840 | POR1    | Mitochondrial outer membrane protein porin 1                       | 1.64 |
| P32527 | ZUO1    | Zuotin                                                             | 1.62 |
| P40303 | PRE6    | Proteasome subunit alpha type-4                                    | 1.61 |
| P31412 | VMA5    | V-type proton ATPase subunit C                                     | 1.60 |
| P15703 | BGL2    | Glucan 1 3-beta-glucosidase                                        | 1.60 |
| Q12118 | SGT2    | Small glutamine-rich tetratricopeptide repeat-containing protein 2 | 1.60 |
| P40150 | SSB2    | Heat shock protein SSB2                                            | 1.60 |
| P46956 | PHO86   | Inorganic phosphate transporter PHO86                              | 1.59 |
| P53173 | ERV14   | ER-derived vesicles protein ERV14                                  | 1.58 |
| P32486 | KRE6    | Beta-glucan synthesis-associated protein KRE6                      | 1.58 |
| P53278 | YGR130C | Uncharacterized protein YGR130C G                                  | 1.58 |
| P14906 | SEC63   | Protein translocation protein SEC63                                | 1.57 |
| Q05359 | ERP1    | Protein ERP1                                                       | 1.57 |
| P29547 | CAM1    | Elongation factor 1-gamma 1                                        | 1.56 |
| P40010 | NUG1    | Nuclear GTP-binding protein NUG1                                   | 1.55 |
| P41811 | SEC27   | Coatomer subunit beta'                                             | 1.55 |
| P05030 | PMA1    | Plasma membrane ATPase 1                                           | 1.55 |
| Q12754 | RRP12   | Ribosomal RNA-processing protein 12                                | 1.55 |
| Q03048 | COF1    | Cofilin                                                            | 1.54 |
| P39730 | FUN12   | Eukaryotic translation initiation factor 5B                        | 1.54 |
| P16861 | PFK1    | 6-phosphofructokinase subunit alpha                                | 1.54 |

|        |       |                                                      |      |
|--------|-------|------------------------------------------------------|------|
| P39076 | CCT2  | T-complex protein 1 subunit beta                     | 1.53 |
| P04807 | HXK2  | Hexokinase-2                                         | 1.53 |
| Q12532 | TAE2  | Translation-associated element 2                     | 1.53 |
| P08431 | GAL7  | Galactose-1-phosphate uridylyltransferase            | 1.52 |
| Q08972 | NEW1  | [NU+] prion formation protein 1                      | 1.51 |
| Q01939 | RPT6  | 26S protease regulatory subunit 8 homolog            | 1.51 |
| P54113 | ADE16 | Bifunctional purine biosynthesis protein ADE16       | 1.51 |
| P15705 | STI1  | Heat shock protein STI1                              | 1.51 |
| P17709 | GLK1  | Glucokinase-1                                        | 1.50 |
| Q05567 | DPL1  | Sphingosine-1-phosphate lyase                        | 1.50 |
| P22515 | UBA1  | Ubiquitin-activating enzyme E1 1                     | 1.50 |
| P32497 | NIP1  | Eukaryotic translation initiation factor 3 subunit C | 1.50 |
| P07170 | ADK1  | Adenylate kinase                                     | 1.50 |
| P22023 | KRE5  | Killer toxin-resistance protein 5                    | 1.49 |
| P54885 | PRO2  | Gamma-glutamyl phosphate reductase                   | 1.49 |
| P32835 | GSP1  | GTP-binding nuclear protein GSP1/CNR1                | 1.49 |
| P32836 | GSP2  | GTP-binding nuclear protein GSP2/CNR2                | 1.49 |
| P39993 | GEA2  | ARF guanine-nucleotide exchange factor 2             | 1.48 |
| P22137 | CHC1  | Clathrin heavy chain                                 | 1.47 |
| Q07478 | SUB2  | ATP-dependent RNA helicase SUB2                      | 1.47 |
| P25491 | YDJ1  | Mitochondrial protein import protein MAS5            | 1.47 |
| P00445 | SOD1  | Superoxide dismutase [Cu-Zn]                         | 1.46 |
| P35732 | DEF1  | RNA polymerase II degradation factor 1               | 1.45 |
| P24031 | PHO3  | Constitutive acid phosphatase                        | 1.44 |
| P31383 | TPD3  | Protein phosphatase PP2A regulatory subunit A        | 1.44 |
| P19146 | ARF2  | ADP-ribosylation factor 2                            | 1.44 |

|        |        |                                                      |      |
|--------|--------|------------------------------------------------------|------|
| P39683 | NPT1   | Nicotinate phosphoribosyltransferase                 | 1.43 |
| P40024 | ARB1   | ABC transporter ATP-binding protein ARB1             | 1.43 |
| P34760 | TSA1   | Peroxiredoxin TSA1                                   | 1.43 |
| Q02932 | KAP120 | Importin beta-like protein KAP120                    | 1.43 |
| P15303 | SEC23  | Protein transport protein SEC23                      | 1.43 |
| P22146 | GAS1   | 1 3-beta-glucanosyltransferase GAS1                  | 1.43 |
| P38707 | DED81  | Asparagine--tRNA ligase cytoplasmic                  | 1.43 |
| P20606 | SAR1   | Small COPII coat GTPase SAR1                         | 1.43 |
| P16603 | NCP1   | NADPH--cytochrome P450 reductase                     | 1.43 |
| P47176 | BAT2   | Branched-chain-amino-acid aminotransferase cytosolic | 1.43 |
| P40474 | QDR2   | Quinidine resistance protein 2                       | 1.42 |
| P47037 | SMC3   | Structural maintenance of chromosomes protein 3      | 1.42 |
| Q03940 | RVB1   | RuvB-like protein 1                                  | 1.42 |
| P32352 | ERG2   | C-8 sterol isomerase                                 | 1.42 |
| P36008 | TEF4   | Elongation factor 1-gamma 2                          | 1.41 |
| P40302 | PRE5   | Proteasome subunit alpha type-6                      | 1.41 |
| P27692 | SPT5   | Transcription elongation factor SPT5                 | 1.41 |
| P19524 | MYO2   | Myosin-2                                             | 1.41 |
| P52593 | NUP188 | Nucleoporin NUP188                                   | 1.40 |
| P25294 | SIS1   | Protein SIS1                                         | 1.40 |
| Q03103 | ERO1   | Endoplasmic oxidoreductin-1                          | 1.40 |
| P32471 | EFB1   | Elongation factor 1-beta                             | 1.40 |
| P38623 | RCK2   | Serine/threonine-protein kinase RCK2                 | 1.40 |
| P40069 | KAP123 | Importin subunit beta-4                              | 1.40 |
| P19097 | FAS2   | Fatty acid synthase subunit alpha                    | 1.39 |
| P46680 | AIP1   | Actin-interacting protein 1                          | 1.38 |

|        |        |                                                       |      |
|--------|--------|-------------------------------------------------------|------|
| P07342 | ILV2   | Acetolactate synthase catalytic subunit mitochondrial | 1.38 |
| P23615 | SPT6   | Transcription elongation factor SPT6                  | 1.38 |
| P0CX25 | RPL43A | 60S ribosomal protein L43-A                           | 1.37 |
| P33401 | PGM1   | Phosphoglucomutase-1                                  | 1.37 |
| P07703 | RPC40  | DNA-directed RNA polymerases I and III subunit RPAC1  | 1.37 |
| P17555 | SRV2   | Adenylyl cyclase-associated protein                   | 1.37 |
| P32565 | RPN2   | 26S proteasome regulatory subunit RPN2                | 1.36 |
| P32337 | PSE1   | Importin subunit beta-3                               | 1.36 |
| P0CX55 | RPS18A | 40S ribosomal protein S18-A                           | 1.36 |
| Q99190 | TSC13  | Very-long-chain enoyl-CoA reductase                   | 1.36 |
| P23254 | TKL1   | Transketolase 1                                       | 1.36 |
| P10081 | TIF1   | ATP-dependent RNA helicase eIF4A                      | 1.36 |
| Q02642 | EGD1   | Nascent polypeptide-associated complex subunit beta-1 | 1.35 |
| P53691 | CPR6   | Peptidyl-prolyl cis-trans isomerase CPR6              | 1.35 |
| P10080 | SBP1   | Single-stranded nucleic acid-binding protein          | 1.35 |
| P28272 | URA1   | Dihydroorotate dehydrogenase (fumarate)               | 1.35 |
| Q00955 | ACC1   | Acetyl-CoA carboxylase                                | 1.35 |
| P53914 | KRE33  | UPF0202 protein KRE33                                 | 1.34 |
| Q02486 | ABF2   | ARS-binding factor 2 mitochondrial                    | 1.34 |
| Q04951 | SCW10  | Probable family 17 glucosidase SCW10                  | 1.34 |
| P36047 | SDS22  | Protein phosphatase 1 regulatory subunit SDS22        | 1.33 |
| Q07896 | NOC3   | Nucleolar complex-associated protein 3                | 1.33 |
| Q05905 | HRI1   | Protein HRI1                                          | 1.33 |
| P41940 | PSA1   | Mannose-1-phosphate guanyltransferase                 | 1.32 |
| P33307 | CSE1   | Importin alpha re-exporter                            | 1.32 |
| P02829 | HSP82  | ATP-dependent molecular chaperone HSP82               | 1.32 |

|        |         |                                                  |      |
|--------|---------|--------------------------------------------------|------|
| P26637 | CDC60   | Leucine--tRNA ligase cytoplasmic                 | 1.31 |
| P29704 | ERG9    | Squalene synthase                                | 1.31 |
| Q03161 | YMR099C | Glucose-6-phosphate 1-epimerase G                | 1.31 |
| P07263 | HTS1    | Histidine--tRNA ligase mitochondrial             | 1.31 |
| P27614 | CPS1    | Carboxypeptidase S                               | 1.30 |
| P25375 | PRD1    | Saccharolysin                                    | 1.30 |
| Q12250 | RPN5    | 26S proteasome regulatory subunit RPN5           | 1.30 |
| P10592 | SSA2    | Heat shock protein SSA2                          | 1.30 |
| P15454 | GUK1    | Guanylate kinase                                 | 1.29 |
| P11745 | RNA1    | Ran GTPase-activating protein 1                  | 1.29 |
| Q03690 | CLU1    | Clustered mitochondria protein 1                 | 1.29 |
| P15108 | HSC82   | ATP-dependent molecular chaperone HSC82          | 1.28 |
| P04397 | GAL10   | Bifunctional protein GAL10                       | 1.28 |
| P40495 | LYS12   | Homoisocitrate dehydrogenase mitochondrial       | 1.28 |
| P16521 | YEF3    | Elongation factor 3A                             | 1.28 |
| P00817 | IPP1    | Inorganic pyrophosphatase                        | 1.28 |
| P06105 | SCP160  | Protein SCP160                                   | 1.27 |
| P26321 | RPL5    | 60S ribosomal protein L5                         | 1.27 |
| P00925 | ENO2    | Enolase 2                                        | 1.27 |
| P25087 | ERG6    | Sterol 24-C-methyltransferase                    | 1.27 |
| P02994 | TEF1    | Elongation factor 1-alpha                        | 1.27 |
| P02407 | RPS17A  | 40S ribosomal protein S17-A                      | 1.26 |
| P38934 | BFR1    | Nuclear segregation protein BFR1                 | 1.26 |
| P15646 | NOP1    | rRNA 2'-O-methyltransferase fibrillarin          | 1.26 |
| P35691 | TMA19   | Translationally-controlled tumor protein homolog | 1.26 |
| P36015 | YKT6    | Synaptobrevin homolog YKT6                       | 1.26 |

|        |       |                                                              |      |
|--------|-------|--------------------------------------------------------------|------|
| P07260 | CDC33 | Eukaryotic translation initiation factor 4E                  | 1.25 |
| P36016 | LHS1  | Heat shock protein 70 homolog LHS1                           | 1.25 |
| P32324 | EFT1  | Elongation factor 2                                          | 1.25 |
| P46654 | RPS0B | 40S ribosomal protein S0-B                                   | 1.25 |
| P11484 | SSB1  | Heat shock protein SSB1                                      | 1.25 |
| P41807 | VMA13 | V-type proton ATPase subunit H                               | 1.25 |
| P53731 | ARC35 | Actin-related protein 2/3 complex subunit 2                  | 1.24 |
| P33775 | PMT1  | Dolichyl-phosphate-mannose--protein<br>mannosyltransferase 1 | 1.23 |
| P32473 | PDB1  | Pyruvate dehydrogenase E1 component subunit beta             | 1.23 |
| P15180 | KRS1  | Lysine--tRNA ligase cytoplasmic                              | 1.23 |
| P09436 | ILS1  | Isoleucine--tRNA ligase cytoplasmic                          | 1.22 |
| P47079 | CCT8  | T-complex protein 1 subunit theta                            | 1.22 |
| Q12117 | MRH1  | Protein MRH1                                                 | 1.22 |
| P0CX36 | RPS4B | 40S ribosomal protein S4-B                                   | 1.22 |
| P05759 | RPS31 | Ubiquitin-40S ribosomal protein S31                          | 1.22 |
| P53064 | RTF1  | RNA polymerase-associated protein RTF1                       | 1.21 |
| P29509 | TRR1  | Thioredoxin reductase 1                                      | 1.21 |
| Q12466 | TCB1  | Tricalbin-1                                                  | 1.20 |
| P0CX39 | RPS8A | 40S ribosomal protein S8-A                                   | 1.20 |
| Q03532 | HAS1  | ATP-dependent RNA helicase HAS1                              | 1.19 |
| P34160 | STO1  | Nuclear cap-binding protein complex subunit 1                | 1.19 |
| Q08179 | MDM38 | Mitochondrial distribution and morphology protein 38         | 1.19 |
| P38817 | GGA2  | ADP-ribosylation factor-binding protein GGA2                 | 1.19 |
| P05737 | RPL7A | 60S ribosomal protein L7-A                                   | 1.18 |
| P36060 | MCR1  | NADH-cytochrome b5 reductase 2                               | 1.18 |
| P52918 | MSN5  | Protein MSN5                                                 | 1.18 |

|        |         |                                               |      |
|--------|---------|-----------------------------------------------|------|
| P07284 | SES1    | Serine--tRNA ligase cytoplasmic               | 1.18 |
| P0CX54 | RPL12B  | 60S ribosomal protein L12-B                   | 1.18 |
| P14020 | DPM1    | Dolichol-phosphate mannosyltransferase        | 1.17 |
| P31373 | CYS3    | Cystathionine gamma-lyase                     | 1.17 |
| P20967 | KGD1    | 2-oxoglutarate dehydrogenase mitochondrial    | 1.17 |
| Q12447 | PAA1    | Polyamine N-acetyltransferase 1               | 1.17 |
| P27476 | NSR1    | Nuclear localization sequence-binding protein | 1.17 |
| Q08977 | YPL260W | UPF0662 protein YPL260W G                     | 1.17 |
| P0CX83 | RPL19B  | 60S ribosomal protein L19-B                   | 1.17 |
| P41805 | RPL10   | 60S ribosomal protein L10                     | 1.16 |
| P39077 | CCT3    | T-complex protein 1 subunit gamma             | 1.15 |
| P23248 | RPS1B   | 40S ribosomal protein S1-B                    | 1.15 |
| P0CX48 | RPS11B  | 40S ribosomal protein S11-B                   | 1.15 |
| P26785 | RPL16B  | 60S ribosomal protein L16-B                   | 1.14 |
| P0CX42 | RPL23B  | 60S ribosomal protein L23-B                   | 1.13 |
| P28777 | ARO2    | Chorismate synthase                           | 1.12 |
| P39078 | CCT4    | T-complex protein 1 subunit delta             | 1.12 |
| P05317 | RPP0    | 60S acidic ribosomal protein P0               | 1.12 |
| P09457 | ATP5    | ATP synthase subunit 5 mitochondrial          | 1.12 |
| P15019 | TAL1    | Transaldolase                                 | 1.11 |
| P0CX52 | RPS16B  | 40S ribosomal protein S16-B                   | 1.11 |
| P33442 | RPS1A   | 40S ribosomal protein S1-A                    | 1.10 |
| Q02753 | PL21A   | 60S ribosomal protein L21-A                   | 1.09 |
| P33322 | CBF5    | H/ACA ribonucleoprotein complex subunit 4     | 1.09 |
| P05626 | ATP4    | ATP synthase subunit 4 mitochondrial          | 1.09 |
| P40212 | RPL13B  | 60S ribosomal protein L13-B                   | 1.08 |

|        |         |                                                            |      |
|--------|---------|------------------------------------------------------------|------|
| P38328 | ARC40   | Actin-related protein 2/3 complex subunit 1                | 1.07 |
| P0CX46 | RPL2B   | 60S ribosomal protein L2-B                                 | 1.06 |
| P38687 | SRP68   | Signal recognition particle subunit SRP68                  | 1.06 |
| Q06252 | YLR179C | Uncharacterized protein YLR179C G                          | 1.06 |
| P28241 | IDH2    | Isocitrate dehydrogenase [NAD] subunit 2 mitochondrial     | 1.06 |
| P0CX49 | RPL18A  | 60S ribosomal protein L18-A                                | 1.05 |
| P07280 | RPS19A  | 40S ribosomal protein S19-A                                | 1.05 |
| P26783 | RPS5    | 40S ribosomal protein S5                                   | 1.03 |
| P0CS90 | SSC1    | Heat shock protein SSC1 mitochondrial                      | 0.96 |
| P14126 | RPL3    | 60S ribosomal protein L3                                   | 0.96 |
| P25443 | RPS2    | 40S ribosomal protein S2                                   | 0.96 |
| P0CX29 | RPS23A  | 40S ribosomal protein S23-A                                | 0.94 |
| P15873 | POL30   | Proliferating cell nuclear antigen                         | 0.93 |
| P18239 | PET9    | ADP ATP carrier protein 2                                  | 0.93 |
| P02406 | RPL28   | 60S ribosomal protein L28                                  | 0.92 |
| P05373 | HEM2    | Delta-aminolevulinic acid dehydratase                      | 0.92 |
| P42943 | CCT7    | T-complex protein 1 subunit eta                            | 0.89 |
| P0C0W1 | RPS22A  | 40S ribosomal protein S22-A                                | 0.87 |
| Q3E7Y3 | RPS22B  | 40S ribosomal protein S22-B                                | 0.87 |
| P00128 | QCR7    | Cytochrome b-c1 complex subunit 7                          | 0.87 |
| P32191 | GUT2    | Glycerol-3-phosphate dehydrogenase mitochondrial           | 0.86 |
| P19414 | ACO1    | Aconitate hydratase mitochondrial                          | 0.86 |
| Q00711 | SDH1    | Succinate dehydrogenase flavoprotein subunit mitochondrial | 0.85 |
| Q12680 | GLT1    | Glutamate synthase [NADH]                                  | 0.84 |
| P40215 | NDE1    | External NADH-ubiquinone oxidoreductase 1                  | 0.83 |



|        |       |                                                           |      |
|--------|-------|-----------------------------------------------------------|------|
|        |       | mitochondrial                                             |      |
| P36010 | YNK1  | Nucleoside diphosphate kinase                             | 0.83 |
| P05375 | OPI3  | Phosphatidyl-N-methylethanolamine N-methyltransferase     | 0.80 |
| P07143 | CYT1  | Cytochrome c1 heme protein mitochondrial                  | 0.78 |
| P23776 | EXG1  | Glucan 1 3-beta-glucosidase I/II                          | 0.78 |
| P37303 | GLY1  | Low specificity L-threonine aldolase                      | 0.76 |
| P47120 | LIA1  | Deoxyhypusine hydroxylase                                 | 0.76 |
| P10659 | SAM1  | S-adenosylmethionine synthase 1                           | 0.69 |
| P25555 | GBP2  | Single-strand telomeric DNA-binding protein GBP2          | 0.65 |
| P21801 | SDH2  | Succinate dehydrogenase iron-sulfur subunit mitochondrial | 0.58 |
| P39105 | PLB1  | Lysophospholipase 1                                       | 0.51 |
| P32340 | NDI1  | Rotenone-insensitive NADH-ubiquinone oxidoreductase       | 0.50 |
| P39676 | YHB1  | Flavohemoprotein                                          | 0.45 |
| Q12512 | ZPS1  | Protein ZPS1                                              | 0.45 |
| P32468 | CDC12 | Cell division control protein 12                          | 0.26 |
| P06106 | MET17 | Protein MET17                                             | 0.18 |
| P32804 | ZRT1  | Zinc-regulated transporter 1                              | 0.11 |

---
